# Supplementary material
Source: HighWire-hosted journal article supplement (https://jnm.snmjournals.org/highwire/filestream/99318/field_highwire_adjunct_files/0/246983_Supplemental_Data.pdf)
Supplement: 246983_Supplemental_Data.pdf [file 246983_Supplemental_Data.pdf]

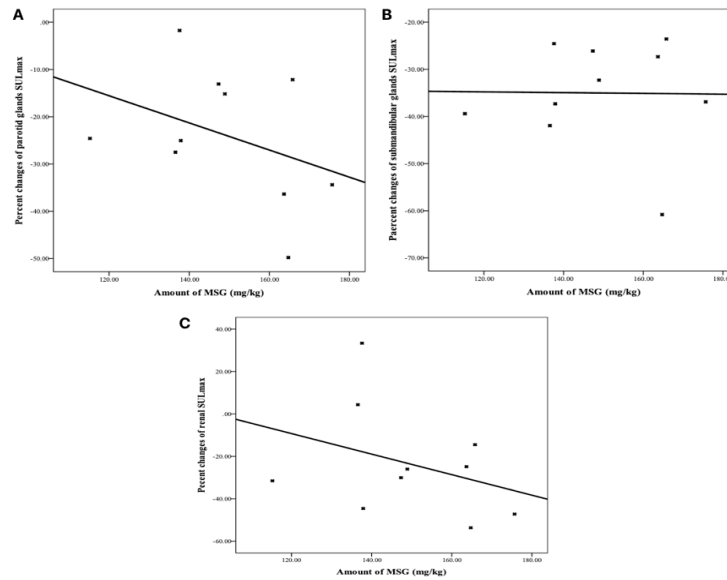

**Supplemental Figure 1.** Dose-response relationship between the MSG amount normalized to body weight and percentage changes of parotid glands (A), submandibular glands (B) and renal (C) SULmax.
